# Supplementary material for: Adjuvant rituximab, a potential treatment for the young patient with Graves’ hyperthyroidism (RiGD): study protocol for a single-arm, single-stage, phase II trial
Source: PubMed Central journal article supplement (PMC6347892; doi:10.1136/bmjopen-2018-024705), 2019-01-21
Supplement: bmjopen-2018-024705supp003.pdf [file bmjopen-2018-024705supp003.pdf]

Young Person aged (12-15 years) Participant Assent Form v4.0

**Adjuvant rituximab – a potential treatment for the young patient with Graves’ hyperthyroidism.**

Short title: Rituximab in Graives’ Disease

Centre Number: \_\_\_\_\_

Participant Number: \_\_\_\_\_

Please **INITIAL** the boxes if you agree:

|   |                                                                                                                                           |  |
|---|-------------------------------------------------------------------------------------------------------------------------------------------|--|
| 1 | I have read and understood the Participant Information Sheet version _____ dated _____.                                                   |  |
| 2 | I have had the chance to ask questions about the study and am happy with the answers given.                                               |  |
| 3 | I understand that I will need to give a blood sample when I come to hospital.                                                             |  |
| 4 | I understand that some of the blood I give for this study will be used for new Exploratory analyses tests                                 |  |
| 5 | I understand that if I do not have to take part in the RiGD study, I know that I can stop at any time and I do not need to give a reason. |  |
| 6 | I agree to take part in this study.                                                                                                       |  |
| 7 | I would like a copy or summary of the results to be sent to me when the study has finished.                                               |  |
| 8 | I agree to using the forms of contraception that have been explained to me if I am sexually active.                                       |  |
| 9 | I agree for a copy of this consent form to be sent securely to the Newcastle Clinical Trials Unit for safety purposes.                    |  |

**To be answered by Female Participants only**

|    |                                                                                                                                                               |  |
|----|---------------------------------------------------------------------------------------------------------------------------------------------------------------|--|
| 10 | I understand that I will need to provide 2 urine samples during the study to make sure that I am not pregnant. I understand that this is for safety purposes. |  |
|----|---------------------------------------------------------------------------------------------------------------------------------------------------------------|--|

\_\_\_\_\_  
Name of Child

\_\_\_\_\_  
Child to write Name here

\_\_\_\_\_  
Date

\_\_\_\_\_  
Name of person taking consent

\_\_\_\_\_  
Signature

\_\_\_\_\_  
Date

**When completed 1 copy for participant, 1 for researcher site file, 1 (original) to be kept in medical notes and 1 copy to send securely to Newcastle Clinical Trials Unit**
